# Supplementary material for: Enhancing drug therapy in ostomy patients: Best practice recommendations for medication management
Source: PubMed Central journal article supplement (PMC11156294; doi:10.1371/journal.pone.0305047), 2024-06-06
Supplement: pone.0305047.s001.pdf [file pone.0305047.s001.pdf]

| <b>S1 Table: List of drugs for classification into ostomy-related PIs</b> |                                                                               |                                   |
|---------------------------------------------------------------------------|-------------------------------------------------------------------------------|-----------------------------------|
| <b>Drugs</b>                                                              | <b>ATC classification (1<sup>st</sup> level)</b>                              | <b>ATC (5<sup>th</sup> level)</b> |
| omeprazole                                                                | <b>A: Alimentary tract and metabolism</b>                                     | A02BC01                           |
| pantoprazole                                                              |                                                                               | A02BC02                           |
| esomeprazole                                                              |                                                                               | A02BC05                           |
| silicones                                                                 |                                                                               | A03AX13                           |
| butylscopolamine                                                          |                                                                               | A03BB01                           |
| metoclopramide                                                            |                                                                               | A03FA01                           |
| domperidone                                                               |                                                                               | A03FA03                           |
| ondansetron                                                               |                                                                               | A04AA01                           |
| granisetron                                                               |                                                                               | A04AA02                           |
| dimenhydrinate                                                            |                                                                               | A04AB02                           |
| ursodeoxycholic acid                                                      |                                                                               | A05AA02                           |
| sodium picosulfate                                                        |                                                                               | A06AB08                           |
| ispaghula (psylla seeds)                                                  |                                                                               | A06AC01                           |
| lactulose                                                                 |                                                                               | A06AD11                           |
| macrogol, combinations                                                    |                                                                               | A06AD65                           |
| prucalopride                                                              |                                                                               | A06AX05                           |
| opium                                                                     |                                                                               | A07DA02                           |
| loperamide                                                                |                                                                               | A07DA03                           |
| pectin                                                                    |                                                                               | A07XP05                           |
| multienzymes (lipase, protease etc.)                                      |                                                                               | A09AA02                           |
| colecalfiferol                                                            | A11CC05                                                                       |                                   |
| potassium chloride                                                        | A12BA01                                                                       |                                   |
| potassium (different salts in combination)                                | A12BA30                                                                       |                                   |
| ferrous glycine sulfate                                                   | <b>B: Blood and blood forming organs</b>                                      | B03AA01                           |
| cyanocobalamin                                                            |                                                                               | B03BA01                           |
| folic acid                                                                |                                                                               | B03BB01                           |
| potassium chloride                                                        |                                                                               | B05XA01                           |
| octreotide*                                                               | <b>H: Systemic hormonal preparations, excluding sex hormones and insulins</b> | H01CB02                           |
| erythromycin*                                                             | <b>J: Antiinfective for systemic use</b>                                      | J01FA01                           |
| oxycodone                                                                 | <b>N: Nervous system</b>                                                      | N02AA05                           |
| metamizole sodium                                                         |                                                                               | N02BB02                           |
| neostigmine*                                                              |                                                                               | N07AA01                           |
| codeine*                                                                  | <b>R: Respiratory system</b>                                                  | R05DA04                           |

**Note:** The drugs were identified in a previous project [33] and are primarily determined by the clinic medication list.

\* The labeled drugs are being used off-label for indications outside the ATC classification.

**Abbreviation:** ATC = Anatomical Therapeutic Chemical (ATC) classification

| <b>S1 Table: List of reasons for PIs according to DokuPIK (classified in regular and ostomy-related PIs)</b> |                                    |
|--------------------------------------------------------------------------------------------------------------|------------------------------------|
| <b>Category: Administration</b>                                                                              |                                    |
| Request/Query concerning administration/compatibility                                                        | regular                            |
| Administration (route)                                                                                       | regular                            |
| Administration (duration)                                                                                    | regular                            |
| Incompatibility or incorrect preparation or reconstitution                                                   | regular                            |
| <b>Category: Adverse drug reaction</b>                                                                       |                                    |
| <b>Category: Contraindication</b>                                                                            |                                    |
| <b>Category: Dose</b>                                                                                        |                                    |
| Failure to adjust dose for organ dysfunction                                                                 | regular                            |
| (Inappropriate) dose                                                                                         | ostomy-related (S1A drugs)         |
| (Inappropriate) administration interval                                                                      | ostomy-related (S1A drugs)         |
| TDM not performed or not considered                                                                          | regular                            |
| <b>Category: Drug</b>                                                                                        |                                    |
| (Clear) indication not (or no longer) given                                                                  | ostomy-related (S1A drugs)         |
| (Clear) indication, but no drug prescribed                                                                   | ostomy-related (S1A drugs)         |
| Drug allergy or medical history not considered                                                               | regular                            |
| Double prescription                                                                                          | regular                            |
| Dispensing error on the ward                                                                                 | regular                            |
| Generic/Therapeutic substitution                                                                             | regular                            |
| Transcription error                                                                                          | regular                            |
| Inappropriate or not most suitable drug formulation in terms of indication                                   | ostomy-related (for all drugs)     |
| Inappropriately or not most suitable drug in terms of costs                                                  |                                    |
| Inappropriate or not most suitable drug in terms of indication                                               | ostomy-related (S1A drugs)         |
| Prescription/Documentation incomplete/incorrect                                                              | regular                            |
| <b>Category: Interaction</b>                                                                                 |                                    |
| <b>Category: Other</b>                                                                                       |                                    |
| Advisory service drug choice                                                                                 | ostomy-related (S1A drugs)         |
| Advisory service drug dose                                                                                   | ostomy-related (S1A drugs)         |
| Procurement/Costs                                                                                            | regular                            |
| Failure to discontinue relevant drugs pre-/perioperatively                                                   | regular                            |
| Patient counselling or education                                                                             | ostomy-related (for ostomy issues) |

**Note:** The term "S1A drugs" refers to the selection of drugs listed in the S1A Table.

**Abbreviation:** TDM = Therapeutic Drug Monitoring
